# Supplementary material for: Beneficial Effects of Slow-Release Large Neutral Amino Acids after a Phenylalanine Oral Load in Patients with Phenylketonuria
Source: MDPI journal article supplement (doi:10.3390/nu13114012), 2021-11-10
Supplement: s1 [file s1]

**Supplementary table S2.** Statistical significance (p-values) of comparisons between mean Phe values at each time-point of the four dietary regimens. Data represent p-values.

|                                       | Time-points |                  | Baseline Diet |                 |                  | Baseline diet + srLNAAAs |                 |                  | Baseline diet + 250 mg Phe + srLNAAAs |                 |                  | Baseline diet + 500 mg Phe + srLNAAAs |                 |                  |
|---------------------------------------|-------------|------------------|---------------|-----------------|------------------|--------------------------|-----------------|------------------|---------------------------------------|-----------------|------------------|---------------------------------------|-----------------|------------------|
|                                       |             |                  | 1             | 2               | 3                | 4                        | 5               | 6                | 7                                     | 8               | 9                | 10                                    | 11              | 12               |
|                                       |             |                  | Before dinner | 2h-after dinner | Before breakfast | Before dinner            | 2h-after dinner | Before breakfast | Before dinner                         | 2h-after dinner | Before breakfast | Before dinner                         | 2h-after dinner | Before breakfast |
| Baseline Diet                         | 1           | Before dinner    |               | 0.7             | 0.9              | 0.8                      |                 |                  | 0.6                                   |                 |                  | 0.4                                   |                 |                  |
|                                       | 2           | 2h-after dinner  | 0.7           |                 | 0.7              |                          | 0.7             |                  |                                       | 0.07            |                  |                                       | 0.9             |                  |
|                                       | 3           | Before breakfast | 0.9           | 0.7             |                  |                          |                 | 0.7              |                                       |                 | 0.6              |                                       |                 | 0.1              |
| Baseline diet + srLNAAAs              | 4           | Before dinner    | 0.8           |                 |                  |                          | 0.8             | 0.9              | 0.4                                   |                 |                  | 0.6                                   |                 |                  |
|                                       | 5           | 2h-after dinner  |               | 0.7             |                  | 0.8                      |                 | 0.7              |                                       | 0.1             |                  |                                       | 0.6             |                  |
|                                       | 6           | Before breakfast |               |                 | 0.7              | 0.9                      | 0.7             |                  |                                       |                 | 0.9              |                                       |                 | 0.2              |
| Baseline diet + 250 mg Phe + srLNAAAs | 7           | Before dinner    | 0.6           |                 |                  | 0.4                      |                 |                  |                                       | 0.3             | 0.2              | 0.12                                  |                 |                  |
|                                       | 8           | 2h-after dinner  |               | 0.07            |                  |                          | 0.1             |                  | 0.3                                   |                 | <b>0.04</b>      |                                       | 0.09            |                  |
|                                       | 9           | Before breakfast |               |                 | 0.6              |                          |                 | 0.9              | 0.2                                   | <b>0.04</b>     |                  |                                       |                 | 0.2              |
| Baseline diet + 500 mg Phe + srLNAAAs | 10          | Before dinner    | 0.4           |                 |                  | 0.6                      |                 |                  | 0.12                                  |                 |                  |                                       | 0.7             | 0.3              |
|                                       | 11          | 2h-after dinner  |               | 0.9             |                  |                          | 0.6             |                  |                                       | 0.09            |                  | 0.7                                   |                 | 0.2              |
|                                       | 12          | Before breakfast |               |                 | 0.1              |                          |                 | 0.2              |                                       |                 | 0.2              | 0.3                                   | 0.2             |                  |

For each dietary regimen, comparisons were done between all time-points (i.e: 2 vs 1; 3 vs 1, 3 vs 2; 6 vs 4, 6 vs 4, 6 vs 5, etc.); among different dietary regimens, comparisons were performed between the same time-point (i.e: 4 vs 1, 5 vs 2, 6 vs 3, 7 vs 1, 8 vs 2, 9 vs 3, etc.). Multiple comparisons between different protocol time-points were carried out by one-way ANOVA followed by Tukey HSD post-hoc test for normally distributed data.
