# Supplementary material for: Beneficial Effects of Slow-Release Large Neutral Amino Acids after a Phenylalanine Oral Load in Patients with Phenylketonuria
Source: MDPI journal article supplement (doi:10.3390/nu13114012), 2021-11-10
Supplement: s1 [file s1]

**Supplementary Table S4.** Statistical significance (p-values) of comparisons between Phe/Tyr values at each time-point of the four dietary regimens. Data represent p-values.

|                                       | Time-points |                  | Baseline Diet      |                    |                  | Baseline diet + srLNAAAs |                 |                  | Baseline diet + 250 mg Phe + srLNAAAs |                    |                  | Baseline diet + 500 mg Phe + srLNAAAs |                    |                    |
|---------------------------------------|-------------|------------------|--------------------|--------------------|------------------|--------------------------|-----------------|------------------|---------------------------------------|--------------------|------------------|---------------------------------------|--------------------|--------------------|
|                                       |             |                  | 1                  | 2                  | 3                | 4                        | 5               | 6                | 7                                     | 8                  | 9                | 10                                    | 11                 | 12                 |
|                                       |             |                  | Before dinner      | 2h-after dinner    | Before breakfast | Before dinner            | 2h-after dinner | Before breakfast | Before dinner                         | 2h-after dinner    | Before breakfast | Before dinner                         | 2h-after dinner    | Before breakfast   |
| Baseline Diet                         | 1           | Before dinner    |                    | 0.5                | 0.5              | <b>0.005</b>             |                 |                  | <b>0.001</b>                          |                    |                  | <b>&lt;0.00001</b>                    |                    |                    |
|                                       | 2           | 2h-after dinner  | 0.5                |                    | 0.5              |                          | 0.1             |                  |                                       | <b>&lt;0.00001</b> |                  |                                       | <b>&lt;0.00001</b> |                    |
|                                       | 3           | Before breakfast | 0.5                | 0.5                |                  |                          |                 | 0.06             |                                       |                    | 0.7              |                                       |                    | 0.4                |
| Baseline diet + srLNAAAs              | 4           | Before dinner    | <b>0.005</b>       |                    |                  |                          | 0.6             | 0.1              | 0.4                                   |                    |                  | <b>0.03</b>                           |                    |                    |
|                                       | 5           | 2h-after dinner  |                    | 0.1                |                  | 0.6                      |                 | 0.4              |                                       | <b>0.0002</b>      |                  |                                       | <b>0.0001</b>      |                    |
|                                       | 6           | Before breakfast |                    |                    | 0.06             | 0.1                      | 0.4             |                  |                                       |                    | 0.2              |                                       |                    | 0.05               |
| Baseline diet + 250 mg Phe + srLNAAAs | 7           | Before dinner    | <b>0.001</b>       |                    |                  | 0.4                      |                 |                  |                                       | 0.08               | <b>0.001</b>     | 0.4                                   |                    |                    |
|                                       | 8           | 2h-after dinner  |                    | <b>&lt;0.00001</b> |                  |                          | <b>0.0002</b>   |                  | 0.08                                  |                    | <b>0.00001</b>   |                                       | 0.9                |                    |
|                                       | 9           | Before breakfast |                    |                    | 0.7              |                          |                 | 0.2              | <b>0.001</b>                          | <b>0.00001</b>     |                  |                                       |                    | 0.6                |
| Baseline diet + 500 mg Phe + srLNAAAs | 10          | Before dinner    | <b>&lt;0.00001</b> |                    |                  | <b>0.03</b>              |                 |                  | 0.4                                   |                    |                  |                                       | 0.1                | <b>&lt;0.00001</b> |
|                                       | 11          | 2h-after dinner  |                    | <b>&lt;0.00001</b> |                  |                          | <b>0.0001</b>   |                  |                                       | 0.9                |                  | 0.1                                   |                    | <b>&lt;0.00001</b> |
|                                       | 12          | Before breakfast |                    |                    | 0.4              |                          |                 | 0.05             |                                       |                    | 0.6              | <b>&lt;0.00001</b>                    | <b>&lt;0.00001</b> |                    |

For each dietary regimen, comparisons were done between all time-points (i.e: 2 vs 1; 3 vs 1, 3 vs 2; 6 vs 4, 6 vs 4, 6 vs 5, etc.); among different dietary regimens, comparisons were performed between the same time-point (i.e: 4 vs 1, 5 vs 2, 6 vs 3, 7 vs 1, 8 vs 2, 9 vs 3, etc.). Multiple comparisons between different protocol time-points were carried out by the one-way ANOVA with repeated measures test followed by Tukey HSD (honestly significant difference) post-hoc test for normally distributed data, and by the Friedman test followed by the Wilcoxon signed-rank test for not normally distributed data.
