# Supplementary material for: Beneficial Effects of Slow-Release Large Neutral Amino Acids after a Phenylalanine Oral Load in Patients with Phenylketonuria
Source: MDPI journal article supplement (doi:10.3390/nu13114012), 2021-11-10
Supplement: s1 [file s1]

**Supplementary Table S1.** Qualitative and quantitative composition per 100 g of the slow-release large neutral amino acids formulation (Neutrafenil Micro R®, PIAM Farmaceutici S.P.A., Genova, Italy).

|                                |                     |
|--------------------------------|---------------------|
| Energy                         | 1686 kj<br>399 Kcal |
| Fat                            | 5.3 g               |
| of which saturated fatty acids | 5.3 g               |
| Carbohydrates                  | 12.0 g              |
| of which sugar                 | 0                   |
| Fibers                         | 5.8 g               |
| Protein Equivalent             | 70.73 g             |
| Salt                           | 1.6 g               |
| L-arginine                     | 1.92 g              |
| Aspartate                      | 4.95 g              |
| L-phenylalanine                | 0 g                 |
| L-isoleucine                   | 10.0 g              |
| L-histidine                    | 3.36 g              |
| L-leucine                      | 12.0 g              |
| L-lysine                       | 5.44 g              |
| L-methionine                   | 2.72 g              |
| L-tyrosine                     | 24 g                |
| L-threonine                    | 2.56 g              |
| L-tryptophan                   | 8.0 g               |
| L-valine                       | 10.0 g              |
