# Supplementary material for: Beneficial Effects of Slow-Release Large Neutral Amino Acids after a Phenylalanine Oral Load in Patients with Phenylketonuria
Source: MDPI journal article supplement (doi:10.3390/nu13114012), 2021-11-10
Supplement: s1 [file s1]

**Supplementary table S3.** Statistical significance (p-values) of comparisons between mean Tyr values at each time-point of the four dietary regimens. Data represent p-values.

|                                     | Time-points |                  | Baseline Diet     |                   |                  | Baseline diet + srLNAA |                 |                  | Baseline diet + 250 mg Phe + srLNAA |                   |                   | Baseline diet + 500 mg Phe + srLNAA |                   |                   |
|-------------------------------------|-------------|------------------|-------------------|-------------------|------------------|------------------------|-----------------|------------------|-------------------------------------|-------------------|-------------------|-------------------------------------|-------------------|-------------------|
|                                     |             |                  | 1                 | 2                 | 3                | 4                      | 5               | 6                | 7                                   | 8                 | 9                 | 10                                  | 11                | 12                |
|                                     |             |                  | Before dinner     | 2h-after dinner   | Before breakfast | Before dinner          | 2h-after dinner | Before breakfast | Before dinner                       | 2h-after dinner   | Before breakfast  | Before dinner                       | 2h-after dinner   | Before breakfast  |
| Baseline Diet                       | 1           | Before dinner    |                   | <b>0.01</b>       | 0.7              | <b>0.002</b>           |                 |                  | <b>0.001</b>                        |                   |                   | <b>&lt;0.0001</b>                   |                   |                   |
|                                     | 2           | 2h-after dinner  | <b>0.01</b>       |                   | <b>0.01</b>      |                        | <b>0.01</b>     |                  |                                     | <b>&lt;0.0001</b> |                   |                                     | <b>&lt;0.0001</b> |                   |
|                                     | 3           | Before breakfast | 0.7               | <b>0.01</b>       |                  |                        |                 | <b>0.0008</b>    |                                     |                   | 0.2               |                                     |                   | 0.19              |
| Baseline diet + srLNAA              | 4           | Before dinner    | <b>0.002</b>      |                   |                  |                        | 0.69            | <b>0.02</b>      | 0.29                                |                   |                   | <b>0.02</b>                         |                   |                   |
|                                     | 5           | 2h-after dinner  |                   | <b>0.01</b>       |                  | 0.69                   |                 | 0.07             |                                     | <b>0.01</b>       |                   |                                     | <b>0.004</b>      |                   |
|                                     | 6           | Before breakfast |                   |                   | <b>0.0008</b>    | <b>0.02</b>            | 0.07            |                  |                                     |                   | <b>0.03</b>       |                                     |                   | <b>0.004</b>      |
| Baseline diet + 250 mg Phe + srLNAA | 7           | Before dinner    | <b>0.001</b>      |                   |                  | 0.29                   |                 |                  |                                     | 0.05              | <b>&lt;0.0001</b> | 0.3                                 |                   |                   |
|                                     | 8           | 2h-after dinner  |                   | <b>&lt;0.0001</b> |                  |                        | <b>0.01</b>     |                  | 0.05                                |                   | <b>&lt;0.0001</b> |                                     | 0.9               |                   |
|                                     | 9           | Before breakfast |                   |                   | 0.2              |                        |                 | <b>0.03</b>      | <b>&lt;0.0001</b>                   | <b>&lt;0.0001</b> |                   |                                     |                   | 0.65              |
| Baseline diet + 500 mg Phe + srLNAA | 10          | Before dinner    | <b>&lt;0.0001</b> |                   |                  | <b>0.02</b>            |                 |                  | 0.3                                 |                   |                   |                                     | 0.2               | <b>&lt;0.0001</b> |
|                                     | 11          | 2h-after dinner  |                   | <b>&lt;0.0001</b> |                  |                        | <b>0.004</b>    |                  |                                     | 0.9               |                   | 0.2                                 |                   | <b>&lt;0.0001</b> |
|                                     | 12          | Before breakfast |                   |                   | 0.19             |                        |                 | <b>0.004</b>     |                                     |                   | 0.65              | <b>&lt;0.0001</b>                   | <b>&lt;0.0001</b> |                   |

For each dietary regimen, comparisons were done between all time-points (example: 2 vs 1; 3 vs 1, 3 vs 2; 6 vs 4, 6 vs 5, etc.); among different dietary regimens, comparisons were performed between the same time-point (example: 4 vs 1, 5 vs 2, 6 vs 3, 7 vs 1, 8 vs 2, 9 vs 3, etc.). Multiple comparisons between different protocol time-points were carried out by one-way ANOVA followed by Tukey HSD post-hoc test for normally distributed data.
