# Supplementary material for: Beneficial Effects of Slow-Release Large Neutral Amino Acids after a Phenylalanine Oral Load in Patients with Phenylketonuria
Source: Nutrients. 2021 Nov 10;13(11):4012. doi: 10.3390/nu13114012 (PMC8618154; doi:10.3390/nu13114012)
Supplement: Supplementary file 1 [file nutrients-13-04012-s001.zip]

Archive with 4 entries (4 files):
- Nutrients Supplementary Tables second revision/Supplementary table 1 (2) (2).pdf
- Nutrients Supplementary Tables second revision/Supplementary table 2 (2) (1).pdf
- Nutrients Supplementary Tables second revision/Supplementary table 3 (2) (2).pdf
- Nutrients Supplementary Tables second revision/Supplementary Table 4 _second revision.pdf
